# Supplementary material for: A phylogeographic pattern of the trans-Palaearctic littoral water flea Pleuroхus truncatus (O.F. Müller, 1785) (Cladocera: Chydoridae)
Source: PeerJ. 2025 Apr 24;13:e19355. doi: 10.7717/peerj.19355 (PMC12034245; doi:10.7717/peerj.19355)
Supplement: Supplemental Information 1 — Includes information on sampled localities. [file peerj-13-19355-s001.xlsx]

## Sheet: COI-table
Sequence_ID	Organism	Haplogroup	Country	Region	Locality	Latitude_Longitude	Collection_date	gb_COX1	gb_16S	gb_18S	gb_28S
Pl_009_trun_Altai_m2948	Pleuroxus truncatus	clade B (3)	Russia	Altai Territory	Srednee Mul'tinskoye Lake	49.97848 N 85.83557 E	24-Jul-2013	PQ798953	PQ799026	PQ799073
Pl_010_trun_Altai_m2948	Pleuroxus truncatus	clade B (3)	Russia	Altai Territory	Srednee Mul'tinskoye Lake	49.97848 N 85.83557 E	24-Jul-2013	PQ798954	PQ799027	PQ799074
Pl_011_trun_Altai_m2948	Pleuroxus truncatus	clade B (3)	Russia	Altai Territory	Srednee Mul'tinskoye Lake	49.97848 N 85.83557 E	24-Jul-2013	PQ798955	PQ799028	PQ799075
Pl_012_trun_Altai_m2948	Pleuroxus truncatus	clade B (3)	Russia	Altai Territory	Srednee Mul'tinskoye Lake	49.97848 N 85.83557 E	24-Jul-2013	PQ798956	PQ799029
Pl_013_trun_Moscow_m3099	Pleuroxus truncatus	clade A	Russia	Moscow Area	Botanical Garden of Moscow State University, Moscow City	55.705941 N 37.529406 E	01-Sep-2015	PQ798957	PQ799030	PQ799076
Pl_014_trun_Moscow_m3099	Pleuroxus truncatus	clade A	Russia	Moscow Area	Botanical Garden of Moscow State University, Moscow City	55.705941 N 37.529406 E	01-Sep-2015	PQ798958	PQ799031	PQ799077
Pl_015_trun_Moscow_m3099	Pleuroxus truncatus	clade A	Russia	Moscow Area	Botanical Garden of Moscow State University, Moscow City	55.705941 N 37.529406 E	01-Sep-2015	PQ798959	PQ799032	PQ799078
Pl_016_trun_Moscow_m3099	Pleuroxus truncatus	clade B (3)	Russia	Moscow Area	Botanical Garden of Moscow State University, Moscow City	55.705941 N 37.529406 E	01-Sep-2015	PQ798960	PQ799033
Pl_019_trun_Yakutia_m1969	Pleuroxus truncatus	clade B (3)	Russia	Yakutia Autonomous Republic	Old Tuyma Lake	62.33681 N 131.2744 E	29-Aug-2010	PQ798961	PQ799034	PQ799079
Pl_020_trun_Yakutia_m1969	Pleuroxus truncatus	clade B (3)	Russia	Yakutia Autonomous Republic	Old Tuyma Lake	62.33681 N 131.2744 E	29-Aug-2010	PQ798962	PQ799035	PQ799080
Pl_029_trun_Yakutia_m1928	Pleuroxus truncatus	clade B (3)	Russia	Yakutia Autonomous Republic	Abyucha Lake	63.94306 N 127.5128 E	21-Aug-2010	PQ798963		PQ799081	PQ799125
Pl_031_trun_Yakutia_m1928	Pleuroxus truncatus	clade B (3)	Russia	Yakutia Autonomous Republic	Abyucha Lake	63.94306 N 127.5128 E	21-Aug-2010	PQ798964	PQ799036	PQ799082	PQ799126
Pl_032_trun_Yakutia_m1928	Pleuroxus truncatus	clade B (3)	Russia	Yakutia Autonomous Republic	Abyucha Lake	63.94306 N 127.5128 E	21-Aug-2010	PQ798965	PQ799037	PQ799083	PQ799127
Pl_037_trun_Yakutia_m1944	Pleuroxus truncatus	clade B (3)	Russia	Yakutia Autonomous Republic	Old Suola Lake	62.09863 N 130.1494 E	25-Aug-2010	PQ798966	PQ799038	PQ799084
Pl_038_trun_Yakutia_m1944	Pleuroxus truncatus	clade B (3)	Russia	Yakutia Autonomous Republic	Old Suola Lake	62.09863 N 130.1494 E	25-Aug-2010	PQ798967	PQ799039	PQ799085
Pl_039_trun_Yakutia_m1944	Pleuroxus truncatus	clade B (3)	Russia	Yakutia Autonomous Republic	Old Suola Lake	62.09863 N 130.1494 E	25-Aug-2010	PQ798968	PQ799040	PQ799086
Pl_040_trun_Yakutia_m1944	Pleuroxus truncatus	clade B (3)	Russia	Yakutia Autonomous Republic	Old Suola Lake	62.09863 N 130.1494 E	25-Aug-2010	PQ798969		PQ799087
Pl_053_trun_Yakutia_m1969	Pleuroxus truncatus	clade B (3)	Russia	Yakutia Autonomous Republic	Old Tuyma Lake	62.33681 N 131.2744 E	29-Aug-2010	PQ798970	PQ799041	PQ799088
Pl_054_trun_Yakutia_m1969	Pleuroxus truncatus	clade B (3)	Russia	Yakutia Autonomous Republic	Old Tuyma Lake	62.33681 N 131.2744 E	29-Aug-2010	PQ798971	PQ799042	PQ799089
Pl_059_trun_Yakutia_m1996	Pleuroxus truncatus	clade B (3)	Russia	Yakutia Autonomous Republic	A lake near Yakutsk	62.03011 N 129.7759 E	03-Sep-2010	PQ798972	PQ799043	PQ799090
Pl_060_trun_Yakutia_m1996	Pleuroxus truncatus	clade B (3)	Russia	Yakutia Autonomous Republic	A lake near Yakutsk	62.03011 N 129.7759 E	03-Sep-2010	PQ798973	PQ799044	PQ799091
Pl_061_trun_Yakutia_m1998	Pleuroxus truncatus	clade B (3)	Russia	Yakutia Autonomous Republic	Lena River, Kuria Strelka, town of Yakutsk	62.02006 N 129.7602 E	03-Sep-2010	PQ798974	PQ799045	PQ799092	PQ799128
Pl_062_trun_Yakutia_m1998	Pleuroxus truncatus	clade B (3)	Russia	Yakutia Autonomous Republic	Lena River, Kuria Strelka, town of Yakutsk	62.02006 N 129.7602 E	03-Sep-2010	PQ798975	PQ799046	PQ799093	PQ799129
Pl_063_trun_Yakutia_m1998	Pleuroxus truncatus	clade B (3)	Russia	Yakutia Autonomous Republic	Lena River, Kuria Strelka, town of Yakutsk	62.02006 N 129.7602 E	03-Sep-2010	PQ798976	PQ799047	PQ799094	PQ799130
Pl_064_trun_Yakutia_m1998	Pleuroxus truncatus	clade B (3)	Russia	Yakutia Autonomous Republic	Lena River, Kuria Strelka, town of Yakutsk	62.02006 N 129.7602 E	03-Sep-2010	PQ798977	PQ799048	PQ799095	PQ799131
Pl_065_trun_Yakutia_m2000	Pleuroxus truncatus	clade B (3)	Russia	Yakutia Autonomous Republic	A lake neat Kuria Strelka, town of Yakutsk	62.01894 N 129.7567 E	03-Sep-2010	PQ798978		PQ799096	PQ799132
Pl_066_trun_Yakutia_m2000	Pleuroxus truncatus	clade B (3)	Russia	Yakutia Autonomous Republic	A lake neat Kuria Strelka, town of Yakutsk	62.01894 N 129.7567 E	03-Sep-2010	PQ798979	PQ799049	PQ799097	PQ799133
Pl_067_trun_Yakutia_m2000	Pleuroxus truncatus	clade B (3)	Russia	Yakutia Autonomous Republic	A lake neat Kuria Strelka, town of Yakutsk	62.01894 N 129.7567 E	03-Sep-2010		PQ799050	PQ799098
Pl_068_trun_Yakutia_m2001	Pleuroxus truncatus	clade B (3)	Russia	Yakutia Autonomous Republic	A lake neat Kuria Strelka, town of Yakutsk	62.02113 N 129.7564 E	03-Sep-2010	PQ798980	PQ799051	PQ799099	PQ799134
Pl_069_trun_Yakutia_m2001	Pleuroxus truncatus	clade B (3)	Russia	Yakutia Autonomous Republic	A lake neat Kuria Strelka, town of Yakutsk	62.02113 N 129.7564 E	03-Sep-2010			PQ799100
Pl_070_trun_Yakutia_m2001	Pleuroxus truncatus	clade B (3)	Russia	Yakutia Autonomous Republic	A lake neat Kuria Strelka, town of Yakutsk	62.02113 N 129.7564 E	03-Sep-2010	PQ798981	PQ799052	PQ799101	PQ799135
Pl_085_trun_Krasnoyarsk_m2151	Pleuroxus truncatus	clade B (3)	Russia	Krasnoyarsk Territory	A lake near Mirnoye	62.34 N 89.04 E	17-Jul-2011			PQ799102
Pl_086_trun_Krasnoyarsk_m2151	Pleuroxus truncatus	clade B (3)	Russia	Krasnoyarsk Territory	A lake near Mirnoye	62.34 N 89.04 E	17-Jul-2011			PQ799103
Pl_087_trun_Krasnoyarsk_m2151	Pleuroxus truncatus	clade B (3)	Russia	Krasnoyarsk Territory	A lake near Mirnoye	62.34 N 89.04 E	17-Jul-2011	PQ798982	PQ799053	PQ799104	PQ799136
Pl_088_trun_Krasnoyarsk_m2151	Pleuroxus truncatus	clade B (3)	Russia	Krasnoyarsk Territory	A lake near Mirnoye	62.34 N 89.04 E	17-Jul-2011	PQ798983	PQ799054	PQ799105	PQ799137
Pl_089_trun_Mongolia_m2159	Pleuroxus truncatus	clade B (3)	Mongolia	Khovsgol Aimag	Small lake near Khovsgol Lake	51.6286 N 100.5175 E	28-Jul-2011	PQ798984	PQ799055	PQ799106	PQ799138
Pl_090_trun_Mongolia_m2159	Pleuroxus truncatus	clade B (3)	Mongolia	Khovsgol Aimag	Small lake near Khovsgol Lake	51.6286 N 100.5175 E	28-Jul-2011	PQ798985	PQ799056	PQ799107	PQ799139
Pl_091_trun_Mongolia_m2159	Pleuroxus truncatus	clade B (3)	Mongolia	Khovsgol Aimag	Small lake near Khovsgol Lake	51.6286 N 100.5175 E	28-Jul-2011	PQ798986	PQ799057	PQ799108	PQ799140
Pl_092_trun_Mongolia_m2159	Pleuroxus truncatus	clade B (3)	Mongolia	Khovsgol Aimag	Small lake near Khovsgol Lake	51.6286 N 100.5175 E	28-Jul-2011	PQ798987	PQ799058	PQ799109	PQ799141
Pl_093_trun_Nenets_m2200	Pleuroxus truncatus	clade B (3)	Russia	Nenets Autonomous Okrug, Arkhangelsk Area	A swamp lake	68.34158 N 53.27639 E	02-Jul-2011	PQ798988	PQ799059	PQ799110	PQ799142
Pl_094_trun_Nenets_m2200	Pleuroxus truncatus	clade B (3)	Russia	Nenets Autonomous Okrug, Arkhangelsk Area	A swamp lake	68.34158 N 53.27639 E	02-Jul-2011	PQ798989	PQ799060	PQ799111	PQ799143
Pl_095_trun_Nenets_m2200	Pleuroxus truncatus	clade B (3)	Russia	Nenets Autonomous Okrug, Arkhangelsk Area	A swamp lake	68.34158 N 53.27639 E	02-Jul-2011	PQ798990	PQ799061	PQ799112	PQ799144
Pl_096_trun_Nenets_m2200	Pleuroxus truncatus	clade B (3)	Russia	Nenets Autonomous Okrug, Arkhangelsk Area	A swamp lake	68.34158 N 53.27639 E	02-Jul-2011	PQ798991	PQ799062	PQ799113	PQ799145
Pl_097_pleu_Penza_m2239	Pleuroxus truncatus	clade B (3)	Russia	Penza Area	An oxbow lake near Penza	53.21 N 45.1 E	25-Jul-2011	PQ798992	PQ799063
Pl_099_pleu_Penza_m2239	Pleuroxus truncatus	clade B (3)	Russia	Penza Area	An oxbow lake near Penza	53.21 N 45.11 E	25-Jul-2011	PQ798993	PQ799064
Pl_115_trun_Moscow_m2741	Pleuroxus truncatus	clade A	Russia	Moscow Area	A lane in Shatura	55.56 N 39.46 E	07-Aug-2014	PQ798994	PQ799065	PQ799114	PQ799146
Pl_116_trun_Moscow_m2741	Pleuroxus truncatus	clade A	Russia	Moscow Area	A lane in Shatura	55.56 N 39.46 E	07-Aug-2014	PQ798995	PQ799066	PQ799115	PQ799147
Pl_117_trun_Moscow_m2741	Pleuroxus truncatus	clade A	Russia	Moscow Area	A lane in Shatura	55.56 N 39.46 E	07-Aug-2014	PQ798996	PQ799067	PQ799116	PQ799148
Pl_118_trun_Moscow_m2741	Pleuroxus truncatus	clade A	Russia	Moscow Area	A lane in Shatura	55.56 N 39.46 E	07-Aug-2014	PQ798997		PQ799117	PQ799149
Pl_121_adun_Moscow_m2833	Pleuroxus aduncus	outgroup	Russia	Moscow Area	A lake near Khirino	55.039739 N 37.982387 E	13-Oct-2014	PQ798952	PQ799025	PQ799072	PQ799124
Pl_123_trun_Altai_m2948	Pleuroxus truncatus	clade B (3)	Russia	Altai Territory	Srednee Mul'tinskoye Lake	49.97848 N 85.83557 E	24-Jul-2013	PQ798998	PQ799068	PQ799118	PQ799150
Pl_124_trun_Altai_m2948	Pleuroxus truncatus	clade B (3)	Russia	Altai Territory	Srednee Mul'tinskoye Lake	49.97848 N 85.83557 E	24-Jul-2013	PQ798999	PQ799069	PQ799119	PQ799151
Pl_125_trun_Altai_m2948	Pleuroxus truncatus	clade B (3)	Russia	Altai Territory	Srednee Mul'tinskoye Lake	49.97848 N 85.83557 E	24-Jul-2013	PQ799000	PQ799070	PQ799120	PQ799152
Pl_126_trun_Altai_m2948	Pleuroxus truncatus	clade B (3)	Russia	Altai Territory	Srednee Mul'tinskoye Lake	49.97848 N 85.83557 E	24-Jul-2013	PQ799001	PQ799071	PQ799121	PQ799153
Ple003_trun_Spb_m0027	Pleuroxus truncatus	clade A	Russia	St-Petersburg	Verkhnee Suzdal'skoe Lake, Suzdal'skie Lakes, N of St Petersburg	60.03539 N 30.3145 E	15-Sep-2004	PQ799002			PQ799154
Ple004_trun_Spb_m0027	Pleuroxus truncatus	clade A	Russia	St-Petersburg	Verkhnee Suzdal'skoe Lake, Suzdal'skie Lakes, N of St Petersburg	60.03539 N 30.3145 E	15-Sep-2004	PQ799003			PQ799155
Ple006_trun_Spb_m0030	Pleuroxus truncatus	clade A	Russia	St-Petersburg	Nizhnee Bol'shoe Suzdal'skoe Lake, Suzdal'skie Lakes, N of St Petersburg	60.04172 N 30.30361 E	15-Sep-2004	PQ799004			PQ799156
Ple007_trun_Spb_m0030	Pleuroxus truncatus	clade A	Russia	St-Petersburg	Nizhnee Bol'shoe Suzdal'skoe Lake, Suzdal'skie Lakes, N of St Petersburg	60.04172 N 30.30361 E	15-Sep-2004	PQ799005			PQ799157
Ple008_trun_Spb_m0030	Pleuroxus truncatus	clade A	Russia	St-Petersburg	Nizhnee Bol'shoe Suzdal'skoe Lake, Suzdal'skie Lakes, N of St Petersburg	60.04172 N 30.30361 E	15-Sep-2004	PQ799006			PQ799158
Ple015_trun_Tomsk_m0115	Pleuroxus truncatus	clade B (1)	Russia	Tomsk Area	Lake Bol'shoe Purul'do, near locality Kharsk	57.87967 N 84.3721 E	13-Jul-2005	PQ799007			PQ799159
Ple016_trun_Tomsk_m0115	Pleuroxus truncatus	clade B (3)	Russia	Tomsk Area	Lake Bol'shoe Purul'do, near locality Kharsk	57.87967 N 84.3721 E	13-Jul-2005	PQ799008			PQ799160
Ple017_trun_Tomsk_m0118	Pleuroxus truncatus	clade B (3)	Russia	Tomsk Area	An oxbow water body of River Chulym 2	57.8082 N 84.24583 E	13-Jul-2005	PQ799009			PQ799161
Ple018_trun_Tomsk_m0118	Pleuroxus truncatus	clade B (2)	Russia	Tomsk Area	An oxbow water body of River Chulym 2	57.8082 N 84.24583 E	13-Jul-2005	PQ799010			PQ799162
Ple020_trun_Tomsk_m0118	Pleuroxus truncatus	clade B (3)	Russia	Tomsk Area	An oxbow water body of River Chulym 2	57.8082 N 84.24583 E	13-Jul-2005	PQ799011			PQ799163
Ple025_trun_Tomsk_m0134	Pleuroxus truncatus	clade A	Russia	Tomsk Area	An affluent on Island Ferma, River Ob'	56.417 N 84.0532 E	18-Jul-2005	PQ799012			PQ799164
Ple026_trun_Tomsk_m0134	Pleuroxus truncatus	clade B (1)	Russia	Tomsk Area	An affluent on Island Ferma, River Ob'	56.417 N 84.0532 E	18-Jul-2005	PQ799013			PQ799165
Ple027_trun_Tomsk_m0134	Pleuroxus truncatus	clade B (1)	Russia	Tomsk Area	An affluent on Island Ferma, River Ob'	56.417 N 84.0532 E	18-Jul-2005	PQ799014			PQ799166
Ple057_trun_Tyumen_m0360	Pleuroxus truncatus	clade B (1)	Russia	Tyumen Area	Karachinskaya Staritsa, near village of Karachino (Tobol Basin)	58.03675 N 68.16566 E	16-Aug-2006	PQ799015			PQ799167
Ple059_trun_Ryazan_m0423	Pleuroxus truncatus	clade A	Russia	Ryazan Area	Lake Vilje near Murmino	54.59872 N 40.05133 E	15-Jul-2007	PQ799016
Ple061_trun_Ryazan_m0429	Pleuroxus truncatus	clade A	Russia	Ryazan Area	Pond near Murmino	54.589 N 40.05581 E	15-Jul-2007	PQ799017
Ple070_trun_Yamal_m0575	Pleuroxus truncatus	clade B (3)	Russia	Yamalo-Nenets Autonomour Area	Un-named lake 1 in Nadymsky Gorodok, 31 km from Obskaya Guba	66.0602 N 72.00614 E	17-Jul-2007	PQ799018
Ple075_trun_Pskov_m0589	Pleuroxus truncatus	clade A	Russia	Pskov Area	Shchukinskoe Lake	56.60228 N 29.23992 E	18-Aug-2007	PQ799019
Ple081_trun_Mongolia_m0759	Pleuroxus truncatus	clade B (2)	Mongolia	Zavkhan Aimag	Khungiin-Gol (River)	48.522 N 94.263 E	13-Jul-2008	PQ799020			PQ799168
Ple082_trun_Mongolia_m0759	Pleuroxus truncatus	clade B (2)	Mongolia	Zavkhan Aimag	Khungiin-Gol (River)	48.522 N 94.263 E	13-Jul-2008	PQ799021			PQ799169
Ple084_trun_Mongolia_m0762	Pleuroxus truncatus	clade B (2)	Mongolia	Zavkhan Aimag	Bayan-Nur Lake	48.4481 N 95.1775 E	13-Jul-2008	PQ799022
Ple086_trun_Mongolia_m0762	Pleuroxus truncatus	clade B (2)	Mongolia	Zavkhan Aimag	Bayan-Nur Lake	48.4481 N 95.1775 E	13-Jul-2008	PQ799023
Ple088_trun_Mongolia_m0782	Pleuroxus truncatus	clade B (2)	Mongolia	Olgiy Aimag	Unnamed small river, near Hoton-Nuur Lake, Mongolian Altai	48.548 N 88.46861 E	08-Aug-2008	PQ799024
