# Supplementary material for: A phylogeographic pattern of the trans-Palaearctic littoral water flea Pleuroхus truncatus (O.F. Müller, 1785) (Cladocera: Chydoridae)
Source: PeerJ. 2025 Apr 24;13:e19355. doi: 10.7717/peerj.19355 (PMC12034245; doi:10.7717/peerj.19355)
Supplement: Supplemental Information 2 [file peerj-13-19355-s002.xlsx]

## Sheet: Лист1
		A	B1	B2	B3
A	direct calculation
	mitochondrial tree
	four gene tree
B1	direct calculation	0,012-0,029
	mitochondrial tree	0,234±0,16
	four gene tree	0,116±0,06
B2	direct calculation	0,008-0,021	0,005-0,014
	mitochondrial tree	0,234±0,16	0,222±0,16
	four gene tree	0,151±0,06	0,168±0,06
B3	direct calculation	0,011-0,029	0,006-0,016	0,004-0,011
	mitochondrial tree	0,334±0,26	0,207±0,16	0,101±0,06
	four gene tree	0,272±0,16	0,151±0,06	0,05±0,01
